# Supplementary material for: Intra-individual changes in DNA methylation not mediated by cell-type composition are correlated with aging during childhood
Source: PubMed Central journal article supplement (PMC5073885; doi:10.1186/s13148-016-0277-3), 2016-10-21

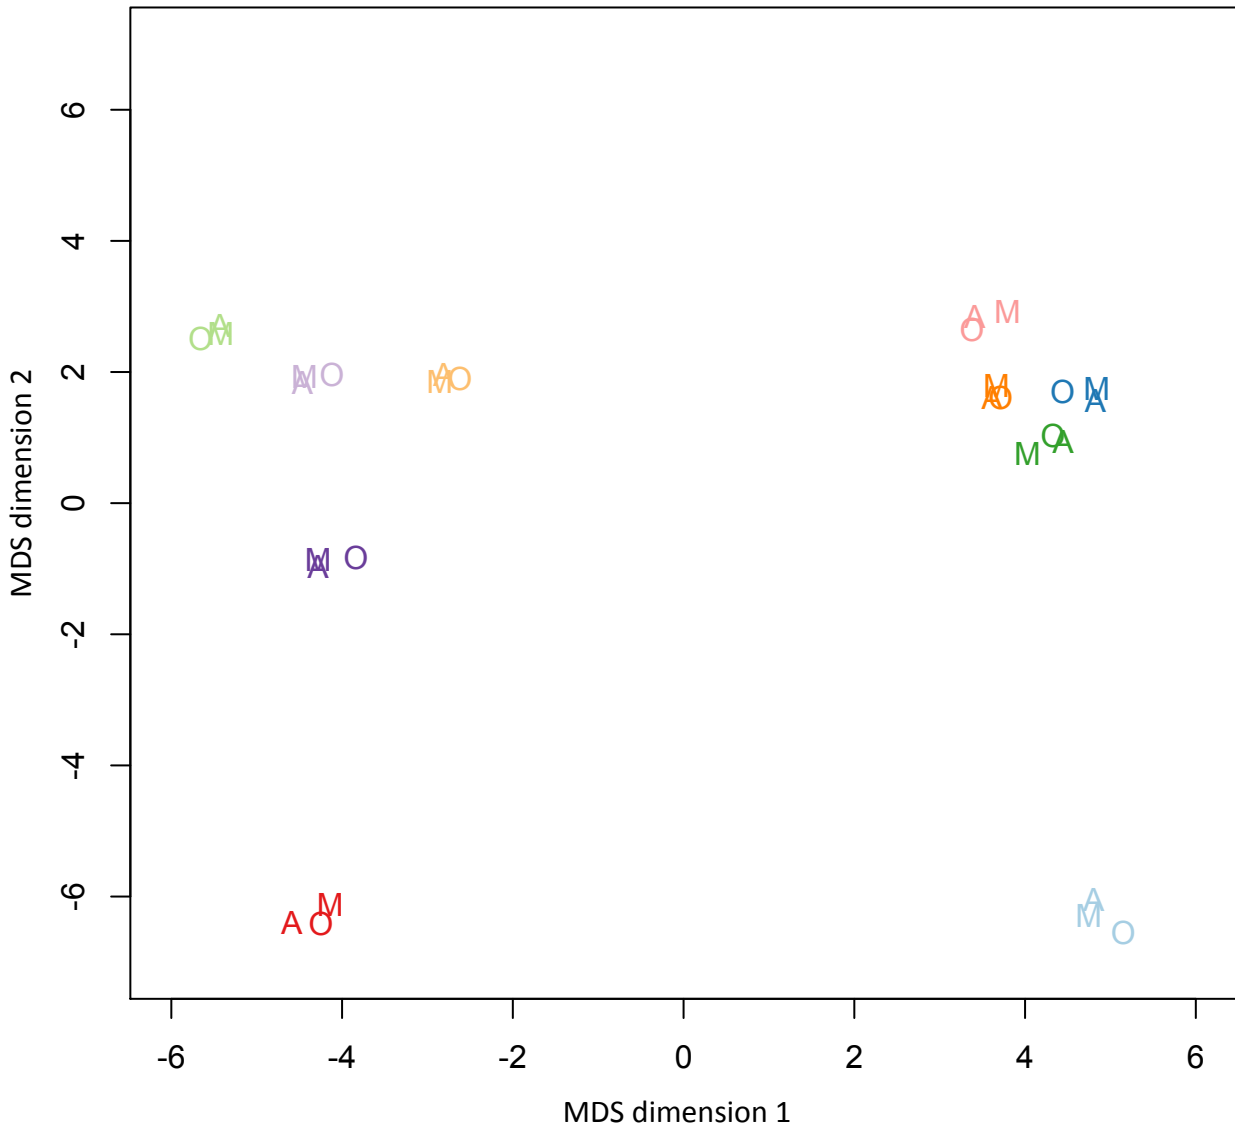

Supplement: 13148_2016_277_MOESM1_ESM.pdf [file 13148_2016_277_MOESM1_ESM.pdf]
