# Supplementary material for: Intra-individual changes in DNA methylation not mediated by cell-type composition are correlated with aging during childhood
Source: PubMed Central journal article supplement (PMC5073885; doi:10.1186/s13148-016-0277-3), 2016-10-21
Supplement: 13148_2016_277_MOESM5_ESM.pdf [file 13148_2016_277_MOESM5_ESM.pdf]

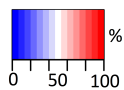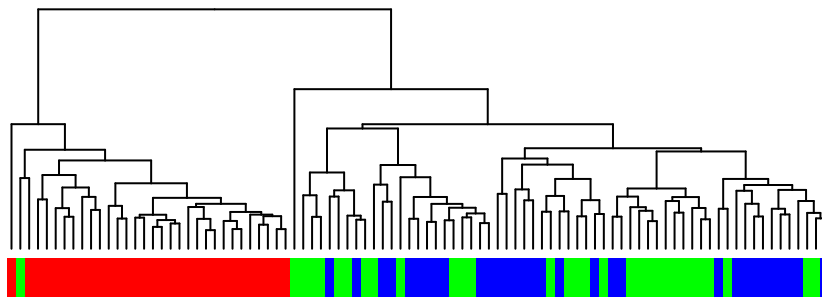

2 years  
10 years  
16 years

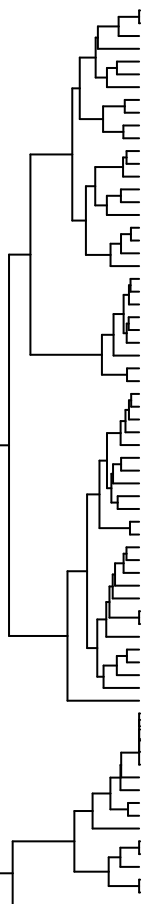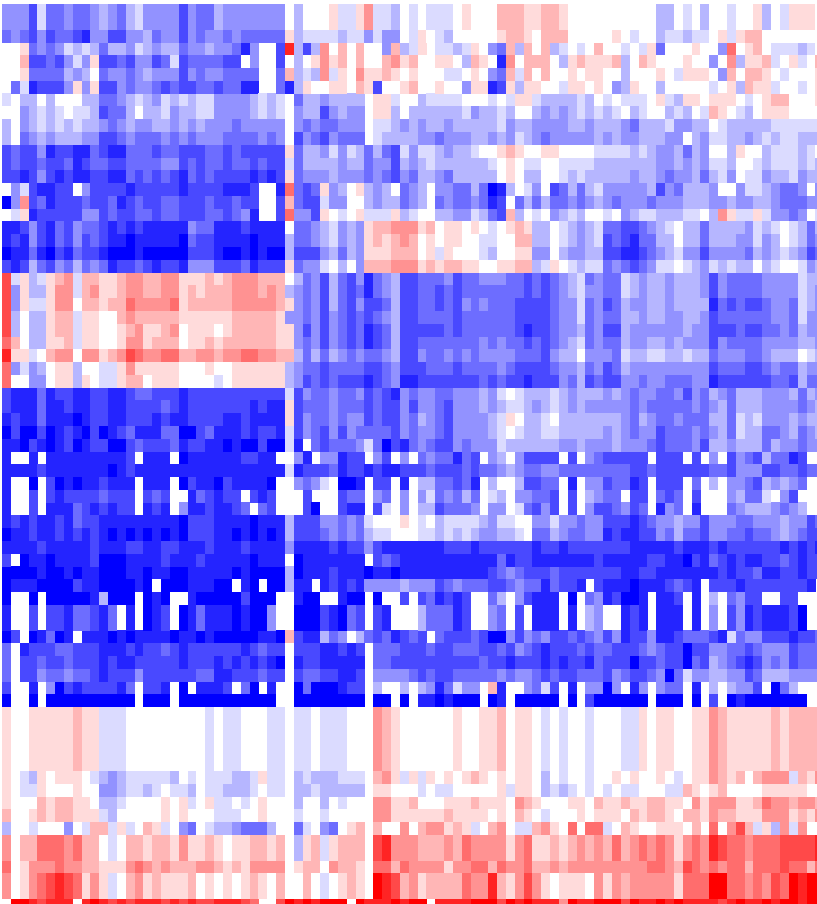

76355115  
76354334  
76354947\_76354955  
156883492  
156883282\_156883285  
156883344\_156883346  
156883222  
78985545\_78985551  
78985562  
78985884\_78985886  
78985800  
76355067  
76354963\_76354965  
76355044  
156883372\_156883374  
156883398  
156883324  
233251460\_233251474  
233251458\_233251460\_233251462  
233251375  
233251436  
100463759  
100463610  
100463583  
100463832\_100463838  
100463619  
100463657  
100463591  
100463812\_100463821\_100463825  
100463771\_100463775\_100463781  
76355009\_76355014\_76355017\_76355020  
76355029  
76355089  
76355068  
76354927  
62679515\_62679524  
76354981\_76354984\_76354990  
62679465  
62679425\_62679427\_62679444  
62679453\_62679455  
233251441\_233251444\_233251448  
233251494  
76355146\_76355149\_76355152  
78985612  
76355136  
233251492\_233251497  
62679459\_62679464  
62679536  
62679450  
156883436  
78985720  
78985530  
78985617\_78985623  
62679509\_62679512  
62679570\_62679572  
78985735  
78985662  
78985825  
78985858  
78985870  
78985772\_78985778  
78985740\_78985742  
78985754\_78985760  
78985846\_78985849\_78985852  
62679365\_62679369\_62679377  
78985632  
78985781  
78985900  
78985795  
78985729  
156883193
